# Supplementary material
Source: publisher figshare collection journal article supplement (https://gsajournals.figshare.com/ndownloader/files/30587085)
Supplement: Supplementary file 1 [file 30587085]

Table S2 Summary of genome assembly of *G leucocontextum*

| **Scaffold characteristics** |  |
| --- | --- |
| Total number | 58 |
| Total length (bp) | 50,048,613 |
| Total gap bases (bp) | 0 |
| Gap number | 0 |
| N50 (bp) | 3,064,430 |
| N90 (bp) | 481,045 |
| Max length (bp) | 5,565,853 |
| GC content (%) | 55.85 |
| **Genome characteristics** |  |
| Genome assembly (Mb) | 50.05 |
| Number of coding sequence genes | 13390 |
| Number of exons | 82,221 |
| Number of introns | 68,831 |
| Average length of coding sequence genes (bp) | 2,208.65 |
| Average exon length (bp) | 281.65 |
| Average intron length (bp) | 93.21 |
| Average number of exons per genes | 6.14 |
